# Supplementary material for: Depressive and anxiety symptoms in caregivers of children with congenital ectopia lentis: a prospective cross-sectional study
Source: HighWire-hosted journal article supplement (doi:10.1136/bmjopen-2023-082159), 2024-08-01
Supplement: bmjopen-2023-082159supp002_data_supplement.pdf [file bmjopen-2023-082159supp002_data_supplement.pdf]

**Supplemental Table1. Analysis of the effect of gender on PHQ-9 and GAD-7 scores**

|              | Female<br>(n=71) | Male<br>(n=37)   | P                  |
|--------------|------------------|------------------|--------------------|
| PHQ-9 scores | 5.6 ± 5.8 (0-25) | 6.4 ± 7.7 (0-21) | 0.979 <sup>a</sup> |
| GAD-7 scores | 5.0 ± 4.9 (0-18) | 5.3 ± 6.1 (0-21) | 0.981 <sup>a</sup> |

PHQ-9 and GAD-7 scores are mean ± standard deviation (range)

<sup>a</sup>Mann-Whitney U test
