# Supplementary figures and images for: Depressive and anxiety symptoms in caregivers of children with congenital ectopia lentis: a prospective cross-sectional study
Source: HighWire-hosted journal article supplement (doi:10.1136/bmjopen-2023-082159), 2024-08-01

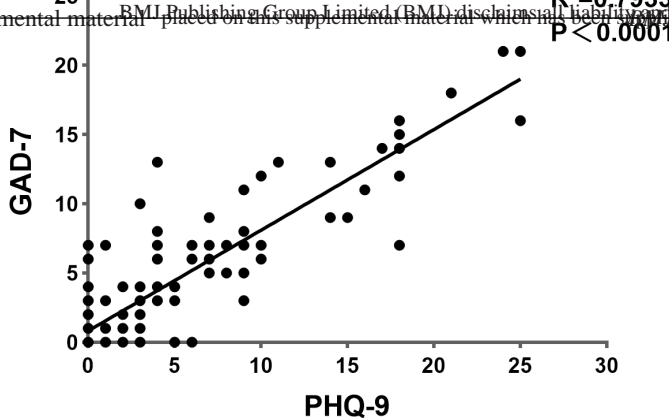

Supplement: bmjopen-2023-082159supp001_data_supplement.pdf [file bmjopen-2023-082159supp001_data_supplement.pdf]
